# Supplementary material for: Which QT Correction Formulae to Use for QT Monitoring?
Source: PubMed Central journal article supplement (PMC4937268; doi:10.1161/jaha.116.003264), 2016-06-17
Supplement: JAH3-5-e003264-s001.pdf [file JAH3-5-e003264-s001.pdf]

## **SUPPLEMENTAL MATERIAL**

**Table S1.** Multivariate Cox Regression analysis for 30-day all-cause mortality

|        | Age  |             |         | Heart rate |             |         | QTc>ULN |              |         | -2 LLR             |
|--------|------|-------------|---------|------------|-------------|---------|---------|--------------|---------|--------------------|
|        | HR   | 95% CI      | p-value | HR         | 95% CI      | p-value | HR      | 95% CI       | p-value | Δ QTcB             |
| QTcB   | 1.04 | 1.02 - 1.06 | <0.001  | 1.04       | 1.01 - 1.06 | 0.004   | 4.49    | 2.31 - 8.74  | <0.001  | 0                  |
| QTcFri | 1.04 | 1.02 - 1.06 | <0.001  | 1.05       | 1.03 - 1.08 | <0.001  | 5.95    | 3.34 - 10.60 | <0.001  | 12.73 <sup>†</sup> |
| QTcFra | 1.04 | 1.02 - 1.06 | <0.001  | 1.05       | 1.03 - 1.08 | <0.001  | 7.31    | 4.10 - 13.05 | <0.001  | 18.09 <sup>‡</sup> |
| QTcH   | 1.04 | 1.02 - 1.06 | <0.001  | 1.06       | 1.03 - 1.08 | <0.001  | 6.18    | 3.41 - 11.20 | <0.001  | 11.94 <sup>†</sup> |
| QTcR   | 1.04 | 1.02 - 1.06 | <0.001  | 1.05       | 1.02 - 1.07 | <0.001  | 6.32    | 3.43 - 11.64 | <0.001  | 9.97 <sup>°</sup>  |

Level of significance: In a 3 parameters analysis a Δ -2 LLR between models >5.99 is statistically significant at level p<0.050. For all QTc formulae the regression models were significant better compared to QTcB. The model with QTcFra was significant better than these with QTcH and QTcR.

° =p<0.010; † =p<0.005; ‡ =p<0.001

Abbreviations:

-2 LLR Δ QTcB: difference of -2 Log Likelihood Ratio compared to the model including QTcB; CI: confidence interval; HR: hazard ratio; QTc>ULN: QTc value above upper limit of normal; QTcB: QT correction with Bazett formula; QTcFri: QT correction with Fridericia formula; QTcFra: QT correction with Framingham formula; QTcH: QT correction with Hodges formula; QTcR: QT correction with Rautaharju formula.

**Table S2.** Multivariate Cox Regression analysis for 1-year all-cause mortality

|        | Age   |             |         | Heart rate |             |         | QRSd  |             |         | QTc>ULN |             |         | -2 LLR             |
|--------|-------|-------------|---------|------------|-------------|---------|-------|-------------|---------|---------|-------------|---------|--------------------|
|        | HR    | 95% CI      | p-value | HR         | 95% CI      | p-value | HR    | 95% CI      | p-value | HR      | 95% CI      | p-value | $\Delta$ QTcB      |
| QTcB   | 1.043 | 1.034-1.053 | <0.001  | 1.030      | 1.018-1.043 | <0.001  | 0.990 | 0.980-1.001 | 0.074   | 2.899   | 1.968-4.270 | <0.001  | 0                  |
| QTcFri | 1.043 | 1.033-1.052 | <0.001  | 1.037      | 1.025-1.049 | <0.001  | 0.989 | 0.979-1.000 | 0.044   | 3.238   | 2.307-4.544 | <0.001  | 13.32 <sup>†</sup> |
| QTcFra | 1.044 | 1.034-1.053 | <0.001  | 1.038      | 1.026-1.051 | <0.001  | 0.990 | 0.979-1.001 | 0.062   | 3.197   | 2.232-4.581 | <0.001  | 8.21 <sup>*</sup>  |
| QTcH   | 1.044 | 1.034-1.053 | <0.001  | 1.040      | 1.028-1.052 | <0.001  | 0.990 | 0.979-1.000 | 0.061   | 3.043   | 2.132-4.343 | <0.001  | 6.87               |
| QTcR   | 1.043 | 1.034-1.053 | <0.001  | 1.035      | 1.023-1.048 | <0.001  | 0.991 | 0.980-1.001 | 0.083   | 3.321   | 2.287-4.824 | <0.001  | 7.10               |

Level of significance: In a 4 parameters analysis a  $\Delta$  -2 LLR between models >7.81 is statistically significant at level  $p < 0.050$ . The regression models with QTcFri and QTcFra were significant better predictors of 1-year all-cause mortality compared to QTcB. There were no other significant differences between QTc formulae.

\* = $p < 0.050$ ; † = $p < 0.005$

Abbreviations:

-2 LLR  $\Delta$  QTcB: difference of -2 Log Likelihood Ratio compared to the model including QTcB; CI: confidence interval; HR: hazard ratio; QTc>ULN: QTc value above upper limit of normal; QTcB: QT correction with Bazett formula; QTcFri: QT correction with Fridericia formula; QTcFra: QT correction with Framingham formula; QTcH: QT correction with Hodges formula; QTcR: QT correction with Rautaharju formula.

**Table S3.** Multivariate Cox Regression analysis for 1-year cardiac mortality

|        | Age   |             |         | Heart rate |             |         | QRSd  |             |         | QTc>ULN |              |         | -2 LLR        |
|--------|-------|-------------|---------|------------|-------------|---------|-------|-------------|---------|---------|--------------|---------|---------------|
|        | HR    | 95% CI      | p-value | HR         | 95% CI      | p-value | HR    | 95% CI      | p-value | HR      | 95% CI       | p-value | $\Delta$ QTcB |
| QTcB   | 1.042 | 1.022-1.063 | <0.001  | 1.036      | 1.010-1.063 | 0.006   | 1.023 | 1.001-1.046 | 0.039   | 4.484   | 2.252-8.930  | <0.001  | 0             |
| QTcFri | 1.042 | 1.022-1.063 | <0.001  | 1.049      | 1.023-1.075 | <0.001  | 1.023 | 1.000-1.045 | 0.047   | 4.355   | 2.310-8.213  | <0.001  | 2.04          |
| QTcFra | 1.044 | 1.023-1.064 | <0.001  | 1.051      | 1.024-1.077 | <0.001  | 1.024 | 1.002-1.046 | 0.035   | 4.258   | 2.185-8.297  | <0.001  | -0.27         |
| QTcH   | 1.045 | 1.024-1.066 | <0.001  | 1.052      | 1.027-1.079 | <0.001  | 1.025 | 1.003-1.048 | 0.026   | 3.420   | 1.713-6.827  | <0.001  | -4.56         |
| QTcR   | 1.042 | 1.022-1.063 | <0.001  | 1.046      | 1.020-1.072 | <0.001  | 1.023 | 1.001-1.046 | 0.039   | 5.646   | 2.965-10.752 | <0.001  | 6.19          |

Level of significance: In a 4 parameters analysis a  $\Delta$  -2 LLR between models  $>7.81$  is statistically significant at level  $p<0.050$ . There were no significant differences between models.

Abbreviations:

-2 LLR  $\Delta$  QTcB: difference of -2 Log Likelihood Ratio compared to the model including QTcB; CI: confidence interval; HR: hazard ratio; QTc>ULN: QTc value above upper limit of normal; QTcB: QT correction with Bazett formula; QTcFri: QT correction with Fridericia formula; QTcFra: QT correction with Framingham formula; QTcH: QT correction with Hodges formula; QTcR: QT correction with Rautaharju formula.

**Table S4.** Multivariate Cox Regression analysis for 1-year non-cardiac mortality

|        | Age   |             |         | Heart rate |             |         | QRSd  |             |         | QTc>ULN |             |         | -2 LLR        |
|--------|-------|-------------|---------|------------|-------------|---------|-------|-------------|---------|---------|-------------|---------|---------------|
|        | HR    | 95% CI      | p-value | HR         | 95% CI      | p-value | HR    | 95% CI      | p-value | HR      | 95% CI      | p-value | $\Delta$ QTcB |
| QTcB   | 1.045 | 1.032-1.057 | <0.001  | 1.022      | 1.006-1.037 | 0.006   | 0.979 | 0.966-0.993 | 0.003   | 2.734   | 1.620-4.613 | <0.001  | 0             |
| QTcFri | 1.044 | 1.031-1.056 | <0.001  | 1.028      | 1.013-1.044 | <0.001  | 0.977 | 0.964-0.991 | 0.001   | 3.376   | 2.184-5.219 | <0.001  | 12.10°        |
| QTcFra | 1.045 | 1.032-1.057 | <0.001  | 1.029      | 1.014-1.045 | <0.001  | 0.978 | 0.965-0.992 | 0.002   | 3.219   | 2.021-5.127 | <0.001  | 7.52          |
| QTcH   | 1.045 | 1.032-1.057 | <0.001  | 1.031      | 1.016-1.047 | <0.001  | 0.978 | 0.964-0.992 | 0.002   | 3.166   | 2.007-4.995 | <0.001  | 8.19*         |
| QTcR   | 1.045 | 1.033-1.058 | <0.001  | 1.026      | 1.011-1.042 | 0.001   | 0.980 | 0.966-0.993 | 0.004   | 2.866   | 1.716-4.786 | <0.001  | 1.27          |

Level of significance: In a 4 parameters analysis a  $\Delta$  -2 LLR between models  $>7.81$  is statistically significant at level  $p<0.050$ . The regression models containing QTcFri and QTcH are significant better predictors of 1-year non-cardiac mortality compared to QTcB. QTcFri is also significant better than QTcR.

\* = $p<0.050$ ; ° = $p<0.010$

Abbreviations:

-2 LLR  $\Delta$  QTcB: difference of -2 Log Likelihood Ratio compared to the model including QTcB; CI: confidence interval; HR: hazard ratio; QTc>ULN: QTc value above upper limit of normal; QTcB: QT correction with Bazett formula; QTcFri: QT correction with Fridericia formula; QTcFra: QT correction with Framingham formula; QTcH: QT correction with Hodges formula; QTcR: QT correction with Rautaharju formula.
